# Supplementary material for: Unexpected Amanita phalloides-Induced Hematotoxicity—Results from a Retrospective Study
Source: MDPI journal article supplement (doi:10.3390/toxins16020067), 2024-01-29
Supplement: s1 [file s1]

# Supplementary Materials: Unexpected *Amanita phalloides*-Induced Hematotoxicity—Results from a Retrospective Study

Miranda Visser, Willemien F. J. Hof, Astrid M. Broek, Amanda van Hoek, Joyce J. de Jong, Daan J. Touw and Bart G. J. Dekkers

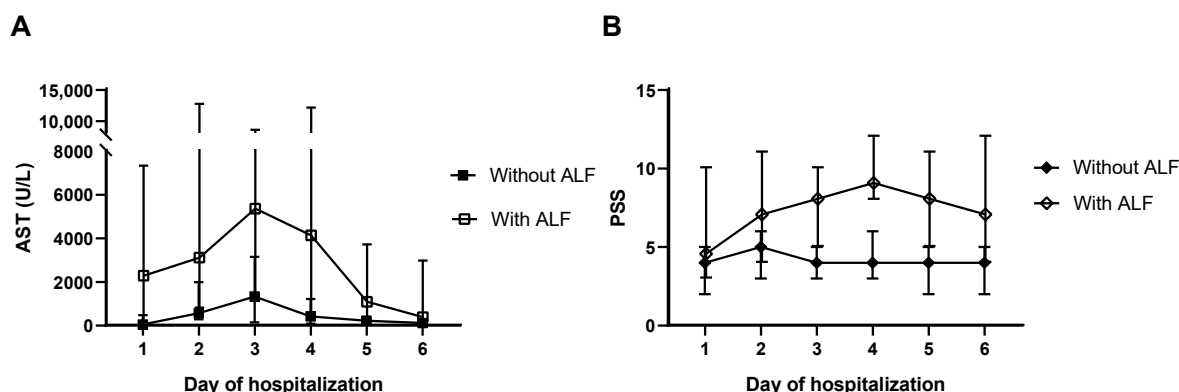

*Supplementary Figure S1. (A) AST concentrations and (B) PSS scores over the time in patients with or without ALF. Data represent medians and range of 22 patients without ALF and 6 patients with ALF.*

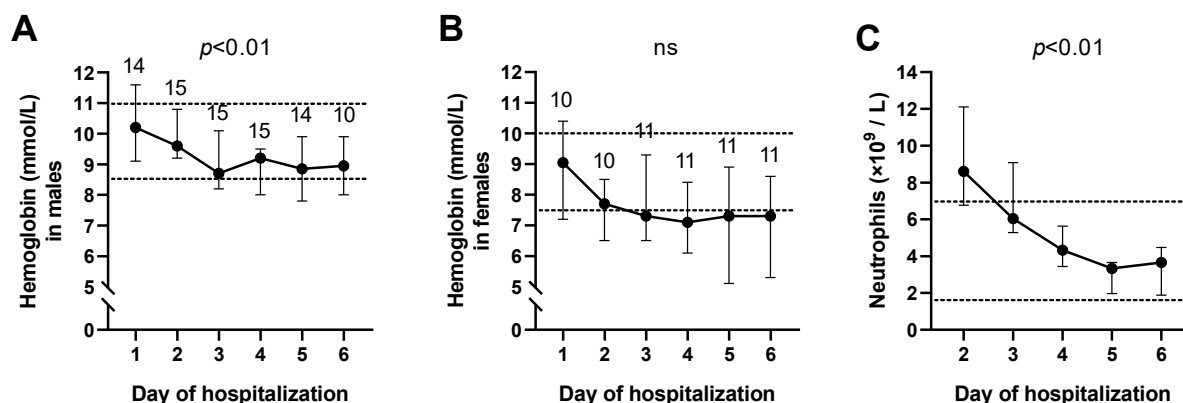

*Supplementary Figure S2. Effect of *Amanita phalloides* poisoning on hemoglobin concentrations in (A) males and (B) females. The number of patients is indicated above the data points. (C) Neutrophil cell number during hospitalization ( $n=3$ ). Upper and lower reference values are indicated by the dotted lines. Data represent medians and range of 3 to 15 patients. ns=not statistically significant.*

Supplementary Table S1: Blood parameters at day 1-6 after *Amanita phalloides* poisonings.

| Blood cell count parameters                   | Day 1                    | Day 2                    | Day 3                    | Day 4                      | Day 5                      | Day 6                      |
|-----------------------------------------------|--------------------------|--------------------------|--------------------------|----------------------------|----------------------------|----------------------------|
| Hematocrit ( <i>n</i> =19)                    | 0.470<br>(0.331 – 0.566) | 0.404<br>(0.301 – 0.537) | 0.394<br>(0.303 – 0.500) | 0.377**<br>(0.258 – 0.466) | 0.370**<br>(0.180 – 0.494) | 0.382**<br>(0.230 – 0.519) |
| - Males ( <i>n</i> =11)                       | 0.500<br>(0.418 – 0.566) | 0.454<br>(0.380 – 0.537) | 0.450<br>(0.346 – 0.500) | 0.406*<br>(0.350 – 0.466)  | 0.399*<br>(0.344 – 0.494)  | 0.420<br>(0.327 – 0.519)   |
| - Females ( <i>n</i> =8)                      | 0.446<br>(0.331 – 0.530) | 0.364<br>(0.301 – 0.530) | 0.334<br>(0.303 – 0.367) | 0.290<br>(0.258 – 0.378)   | 0.273<br>(0.180 – 0.403)   | 0.345<br>(0.230 – 0.398)   |
| Mean Corpuscular Volume (MCV) ( <i>n</i> =16) | 88.1<br>(77.7 – 98.5)    | 87.5<br>(66.0 – 99.1)    | 87.9<br>(76.0 – 99.8)    | 86.7<br>(79.0 – 96.0)      | 85.3<br>(65.5 – 95.0)      | 85.7<br>(65.8 – 95.3)      |
| Erythrocytes ( <i>n</i> =4)                   | 5.76<br>(5.20 – 6.54)    | 5.45<br>(4.82 – 6.48)    | 5.35<br>(4.68 – 5.86)    | 5.06<br>(4.34 – 5.67)      | 5.15<br>(4.44 – 5.77)      | 4.86<br>(4.77 – 5.66)      |
| Microcytic erythrocytes ( <i>n</i> =3)        | 1.5<br>(1.1 – 3.9)       | 1.7<br>(0.9 – 4.2)       | 1.8<br>(1.7 – 5.6)       | 3.2<br>(1.8 – 7.2)         | 2.9<br>(1.2 – 4.2)         | 2.3<br>(1.1 – 3.7)         |
| Reticulocytes ( <i>n</i> =3)                  |                          | 68.8<br>(55.5 – 104.0)   | 67.6<br>(60.4 – 74.8)    | 43.0<br>(34.9 – 66.3)      | 56.8<br>(36.8 – 78.1)      | 68.2<br>(34.5 – 91.7)      |
| Immature reticulocyte fraction ( <i>n</i> =3) |                          | 7.9<br>(7.7 – 10.7)      | 10.3<br>(9.1 – 11.5)     | 8.1<br>(7.7 – 14.3)        | 12.2<br>(7.5 – 15.8)       | 15.8<br>(5.8 – 17.1)       |
| Eosinophils ( <i>n</i> =3)                    |                          | 0.00<br>(0.00 – 0.01)    | 0.01<br>(0.00 – 0.01)    | 0.25<br>(0.22 – 0.26)      | 0.37*<br>(0.30 – 0.53)     | 0.43*<br>(0.30 – 0.84)     |
| Immature granulocytes ( <i>n</i> =3)          |                          | 0.06<br>(0.04 – 0.06)    | 0.03<br>(0.03 – 0.07)    | 0.03<br>(0.02 – 0.06)      | 0.02<br>(0.01 – 0.04)      | 0.03<br>(0.02 – 0.04)      |
| Lymphocytes ( <i>n</i> =3)                    |                          | 0.62<br>(0.58 – 1.88)    | 1.15<br>(0.71 – 1.28)    | 1.63<br>(1.08 – 1.84)      | 2.38<br>(1.21 – 2.93)      | 2.76<br>(1.38 – 3.18)      |

Supplementary Table S1 continued: Blood parameters at day 1-6 after *Amanita phalloides* poisonings.

| Blood cell count parameters         | Day 1                 | Day 2                 | Day 3                 | Day 4                 | Day 5                 | Day 6                 |
|-------------------------------------|-----------------------|-----------------------|-----------------------|-----------------------|-----------------------|-----------------------|
| Basophils ( $n=3$ )                 |                       | 0.02<br>(0.01 – 0.04) | 0.02<br>(0.01 – 0.03) | 0.04<br>(0.01 – 0.05) | 0.04<br>(0.02 – 0.07) | 0.06<br>(0.03 – 0.07) |
| Monocytes ( $n=3$ )                 |                       | 1.02<br>(0.45 – 1.08) | 0.67<br>(0.39 – 0.75) | 0.71<br>(0.35 – 0.76) | 0.64<br>(0.59 – 0.95) | 0.79<br>(0.78 – 0.91) |
| Platelet large cell ratio ( $n=3$ ) | 26.5<br>(26.3 – 47.7) | 29.8<br>(25.7 – 45.5) | 34.5<br>(30.0 – 48.8) | 33.1<br>(26.1 – 43.9) | 33.9<br>(27.4 – 49.9) | 36.5<br>(29.9 – 44.4) |

Data represent medians and range. \*  $p < 0.05$ , \*\*  $p < 0.01$ , \*\*\*  $p < 0.001$ .
